# Supplementary material for: All-visible-light triggered solid-state dual-color fluorescence switching of phenanthroimidazole-based bisthienylethene
Source: Royal Society of Chemistry journal article supplement (doi:10.1039/d2tc00316c), 2022-01-01
Supplement: d2tc00316c1.pdf [file d2tc00316c1.pdf]

*Electronic Supplementary Information for*

**All-visible-light triggered solid-state dual-color fluorescence  
switching of phenanthroimidazole-based bithienylethene**

Qing Yan<sup>a</sup>, Zhu Qiao<sup>a,b</sup>, Weizhen Zhao<sup>c</sup>, Jun Ren<sup>b\*</sup>, Yun Wang<sup>a</sup>, Wanmei Yang<sup>a</sup>,

Sheng Wang<sup>ab\*</sup>

<sup>a</sup> *School of Chemistry and Chemical Engineering, Key Laboratory of Clean Energy Materials Chemistry of Guangdong Higher Education Institutes, Lingnan Normal University, Zhanjiang, 524048, China. E-mail: dyesws@126.com.*

<sup>b</sup> *Ministry of Education Key Laboratory for the Synthesis and Application of Organic Functional Molecules & Hubei Collaborative Innovation Center for Advanced Organic Chemical Materials, Hubei University, Wuhan, 430062, P.R. China. E-mail: renjun@hubu.edu.cn.*

<sup>c</sup> *Beijing Key laboratory of Ionic Liquids Clean Process, Institute of Process Engineering, Chinese Academy of Sciences, Beijing 100190, P. R. China.*

**Table of content**

|                                                                                      |     |
|--------------------------------------------------------------------------------------|-----|
| 1. Synthesis of products <b>BTE-P1</b> and <b>BTE-P2</b> -----                       | S1  |
| 2. Photochromism and fluorescence switching of <b>BTE-P1</b> and <b>BTE-P2</b> ----- | S2  |
| 3. All-visible-light patterning application for information storage-----             | S6  |
| 4. X-ray crystallographic analysis for <b>BTE-P1</b> -----                           | S7  |
| 5. DFT theoretical calculations of <b>BTE-P2</b> -----                               | S14 |
| 6. Size and Photophysical properties of <b>BTE-P1@DSPE-PEG2000</b> -----             | S15 |
| 7. Appendix: NMR spectra-----                                                        | S16 |
| 8. References-----                                                                   | S19 |

## 1. Synthesis of product BTE-P1 and BTE-P2

The synthetic route for target products **BTE-P1** and **BTE-P2** are illustrated in Scheme S1. Compound **BTE-Cl** was prepared according to our previous literature.<sup>[1]</sup> Compound **P1** and **P2** was prepared through Debus-Radziszewski imidazole synthesis.<sup>[2]</sup>

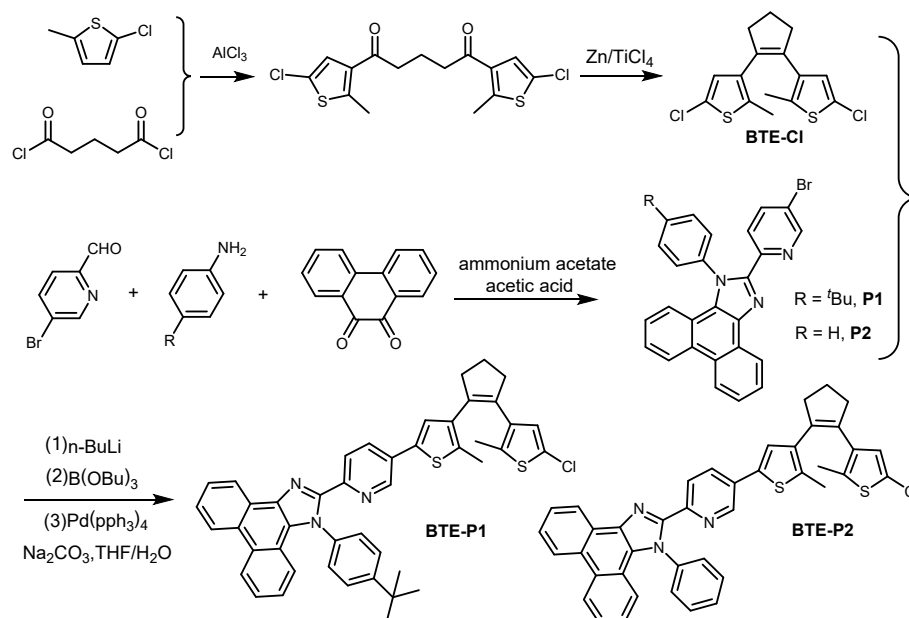

**Scheme S1** Synthetic routes of **BTE-P1** and **BTE-P2**.

## 2. Photochromism and fluorescence switching of BTE-P1 and BTE-P2.

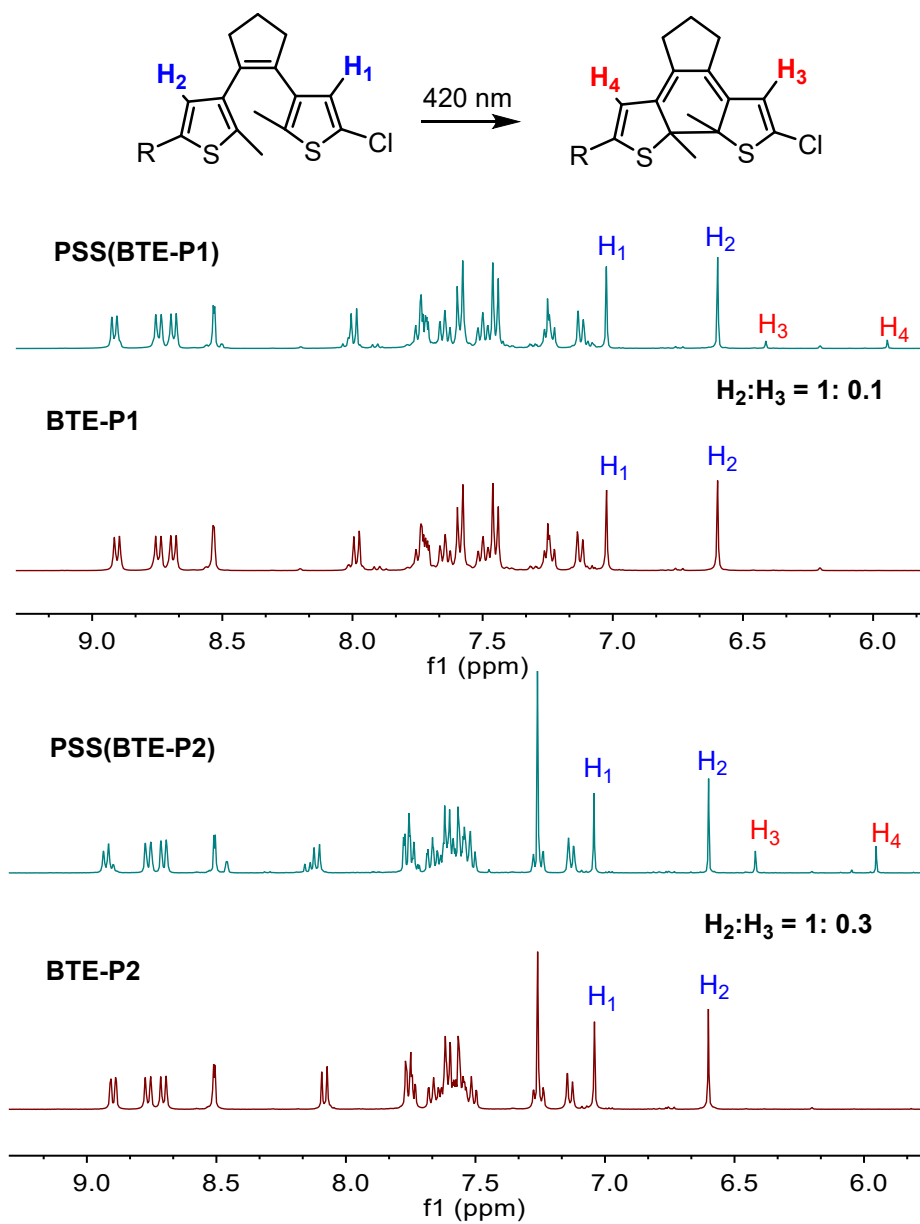

**Fig. S1** Partial <sup>1</sup>H NMR spectra changes of **BTE-P1** and **BTE-P2** with 420 nm light irradiation in CDCl<sub>3</sub> at room temperature.

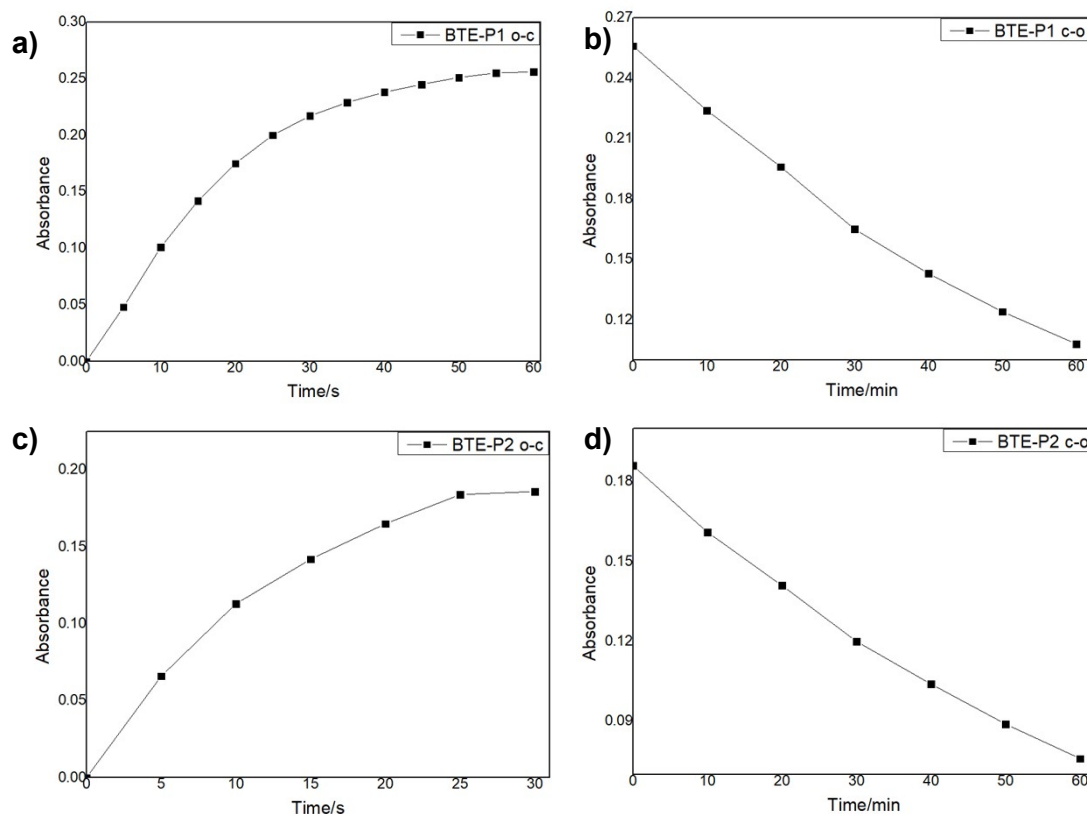

**Fig. S2** Absorbance changes of **BTE-P1** upon irradiation with 310 nm (a) and 520 nm (b) in THF ( $1.0 \times 10^{-5}$  M) monitored at 518 nm for ring-closed isomers. Absorbance changes of **BTE-P2** upon irradiation with 310 nm (c) and 520 nm (d) in THF ( $1.0 \times 10^{-5}$  M) monitored at 517 nm for ring-closed isomers.

**Table S1.** Photochromic parameters of **BTE-P1** and **BTE-P2** in THF ( $1.0 \times 10^{-5}$  M), respectively.

| Name          | Open                   |                            | PSS                    |                            | $\varphi$         |                   | Conversion ratio <sup>e</sup> /(%) |
|---------------|------------------------|----------------------------|------------------------|----------------------------|-------------------|-------------------|------------------------------------|
|               | $\lambda_{\max}^a$ /nm | $\epsilon/(M^{-1}cm^{-1})$ | $\lambda_{\max}^b$ /nm | $\epsilon/(M^{-1}cm^{-1})$ | $\varphi_{o-c}^c$ | $\varphi_{c-o}^d$ |                                    |
| <b>BTE-P1</b> | 375                    | $5.62 \times 10^4$         | 518                    | $2.56 \times 10^4$         | 0.30              | 0.01              | 9                                  |
| <b>BTE-P2</b> | 374                    | $4.68 \times 10^4$         | 517                    | $1.86 \times 10^4$         | 0.40              | 0.02              | 23                                 |

<sup>a</sup>Absorption maxima of ring-open isomers. <sup>b</sup>Absorption maxima of ring-closed isomers. <sup>c</sup>Cyclization quantum yields ( $\varphi_{o-c}$ ). <sup>d</sup>Cycloreversion quantum yields ( $\varphi_{c-o}$ ).

<sup>e</sup>Conversion ratio was calculated through <sup>1</sup>H NMR of PSS.

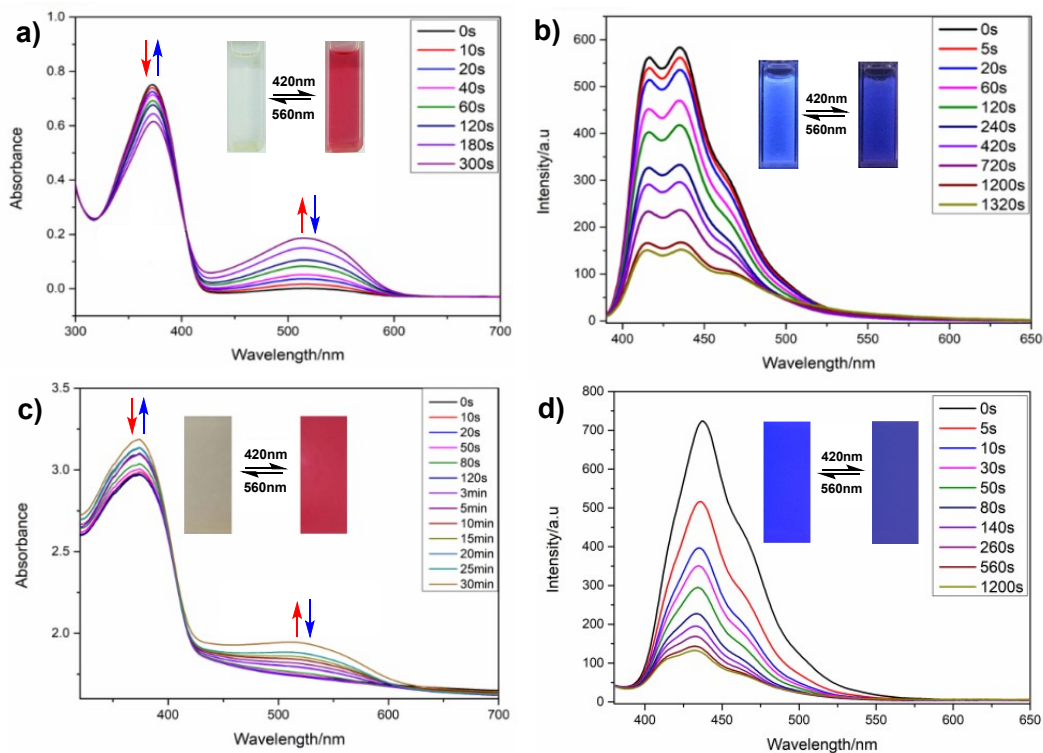

**Fig. S3** The absorption and emission spectra changes of **BTE-P2** in THF solution or PMMA film under alternate 420 nm/550 nm irradiation. Inset: corresponding color and fluorescence changes of **BTE-P2** before and after irradiation. **a)** Absorption spectra changes in THF solution. **b)** Fluorescence spectra in THF solution. **c)** Absorption spectra changes in PMMA film. **d)** Fluorescence spectra in PMMA film.

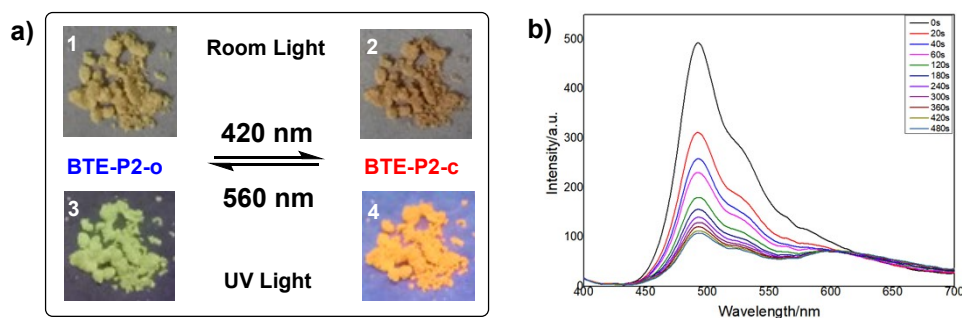

**Fig. S4** The photochromism and fluorescence switching of **BTE-P2** in solid state under alternate 420 nm/560 nm irradiation. **a)** Corresponding color and fluorescence changes of **BTE-P2** (insets 1-4) before and after irradiation. **b)** Fluorescence spectra changes of **BTE-P2**.

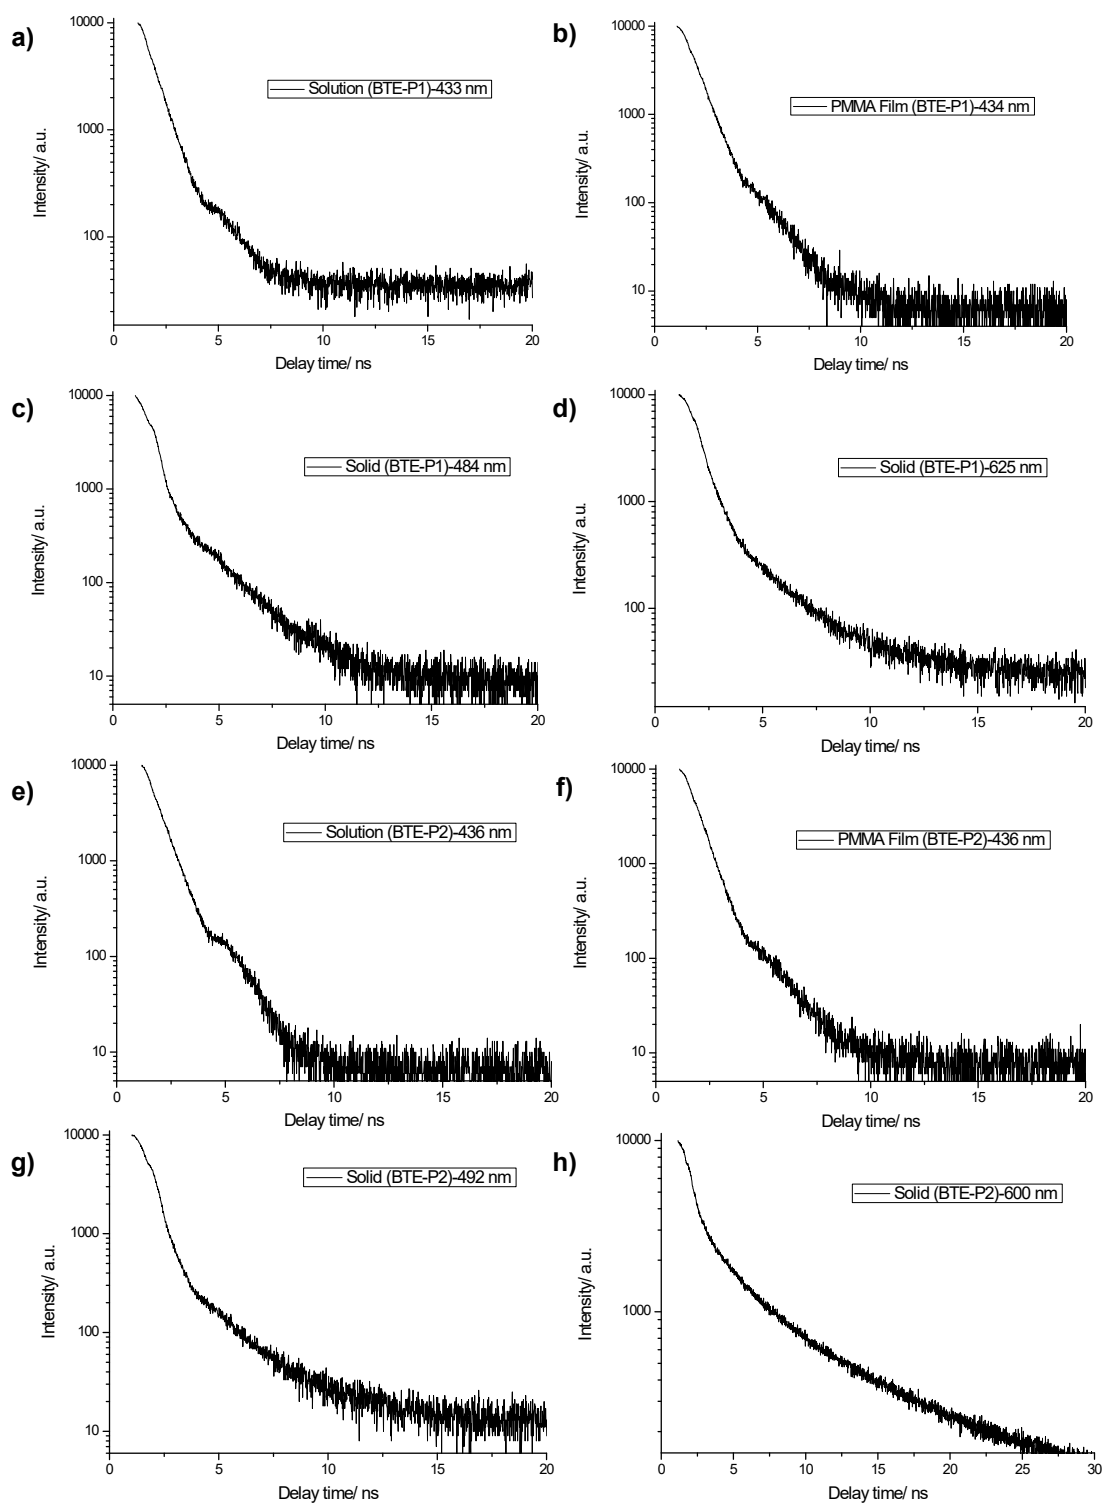

**Fig. S5** Fluorescence decay curves of **BTE-P1** in THF solution (a), PMMA films (b), and solid state (c, d). Fluorescence decay curves of **BTE-P2** in THF solution (e), PMMA films (f), and solid state (g, h). The excitation wavelength was 405 nm.

**Table S2.** Fluorescence parameters of **BTE-P1** and **BTE-P2** in different state.

| Name          | State                 | $\lambda_{em}$<br>(nm) | $\Phi_{F1}^a$ [%]<br>(open) | $\Phi_{F2}^a$ [%]<br>(PSS) | $\tau_1^b$<br>(nm) | $\tau_2^b$<br>(nm) |
|---------------|-----------------------|------------------------|-----------------------------|----------------------------|--------------------|--------------------|
| <b>BTE-P1</b> | Solution <sup>c</sup> | 433                    | 9.73                        | 0.05                       | 0.68               | 2.00               |
|               | PMMA film             | 434                    | 8.25                        | 0.12                       | 0.73               | 2.26               |
|               |                       | 484                    |                             |                            | 0.61               | 2.67               |
|               | Solid                 | 625                    | 16.30                       | 7.18                       | 0.75               | 3.53               |
|               |                       |                        |                             |                            |                    |                    |
| <b>BTE-P2</b> | Solution <sup>c</sup> | 436                    | 7.67                        | 0.03                       | 0.64               | 1.60               |
|               | PMMA film             | 436                    | 7.23                        | 0.24                       | 0.69               | 2.45               |
|               |                       | 492                    |                             |                            | 0.69               | 3.79               |
|               | Solid                 | 600                    | 15.61                       | 6.33                       | 1.00               | 6.31               |
|               |                       |                        |                             |                            |                    |                    |

<sup>a</sup>Fluorescence quantum yield (excitation wavelength = 405 nm). <sup>b</sup>Fluorescence Lifetime (excitation wavelength = 405 nm). <sup>c</sup>in THF solution ( $1.0 \times 10^{-5}$  M).

### 3. All-visible-light patterning application for information storage.

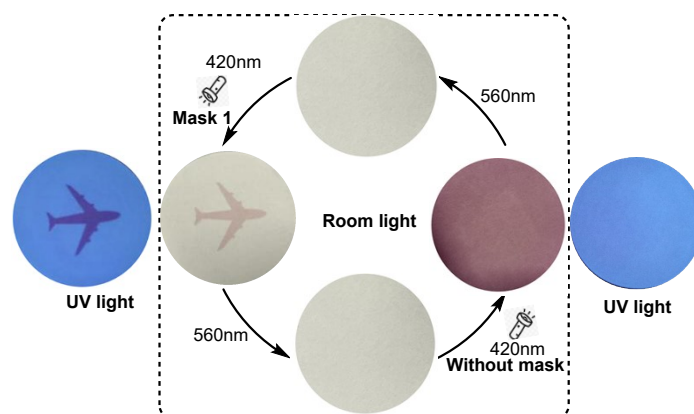

**Fig. S6.** All-visible-light patterning application of **BTE-P2** on a filter paper. A series of images were sequentially written onto and erased from the same filter paper with 420 nm/560 nm irradiation, respectively.

#### 4. X-ray crystallographic analysis for BTE-P1.

single crystals of **BTE-P1** was prepared by slow evaporation of their dichloromethane/ethyl acetate/hexane mixed solutions. Single crystal X-ray crystallographic analysis was conducted on a Bruker APEX-II CCD diffractometer with graphite-monochromated MoK $\alpha$  radiation ( $\lambda = 0.71073 \text{ \AA}$ ) at 273(2) K. The crystal structure was solved by a direct method and refined by the full-matrix least-squares on  $F^2$  using SHELXL-2014 in Olex 2 software. Crystallographic data for the structure in this paper have been deposited with the Cambridge Crystallographic Data Centre as supplemental publication CCDC 2021742.

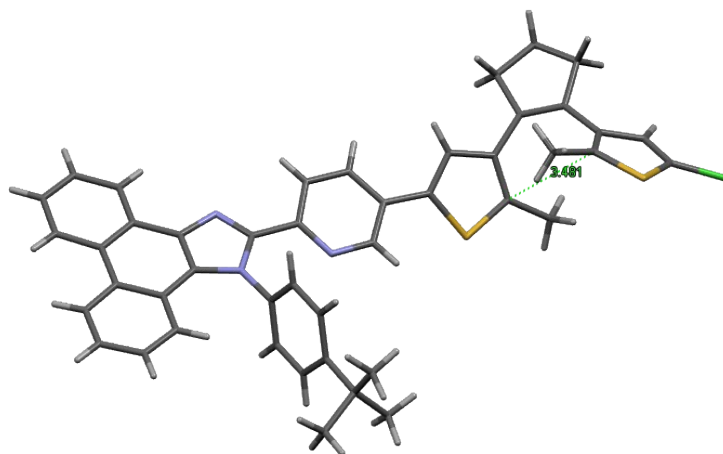

**Fig. S7.** The intramolecular distance between two reactive carbons in **BTE-P1**.

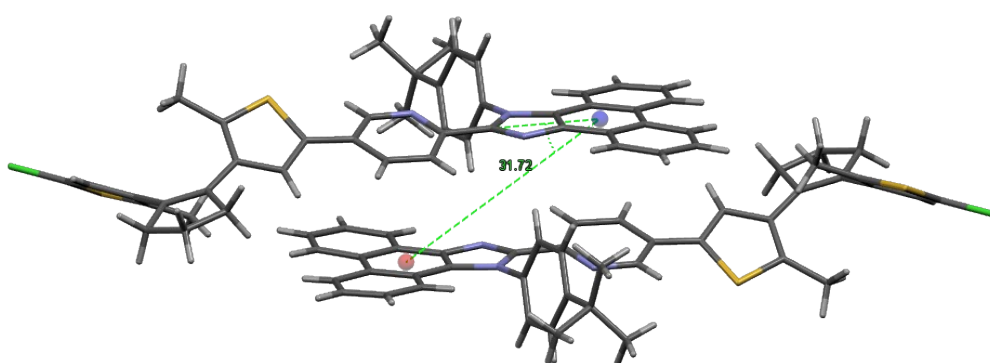

**Fig. S8.** The slip angle in molecular dimer of **BTE-P1**.



**Table S3.** Crystallographic data for **BTE-P1**.

| Compound <b>BTE-P1</b> (CCDC No. 2021742) |                                                                 |                                                  |                                                |
|-------------------------------------------|-----------------------------------------------------------------|--------------------------------------------------|------------------------------------------------|
| Empirical formula                         | C <sub>45</sub> H <sub>38</sub> ClN <sub>3</sub> S <sub>2</sub> | F (000)                                          | 756.0                                          |
| Formula weight                            | 720.35                                                          | Crystal size (mm)                                | 0.50 × 0.29 × 0.05                             |
| Crystal color                             | red                                                             | 2θ range(°)                                      | 5.82 - 49.994                                  |
| Temperature (K)                           | 273.15                                                          | Limiting indices                                 | -14 ≤ h ≤ 14,<br>-15 ≤ k ≤ 15,<br>-17 ≤ l ≤ 17 |
| Wavelength (Å)                            | 0.71073                                                         |                                                  |                                                |
| Crystal system                            | triclinic                                                       |                                                  |                                                |
| Space group                               | P-1                                                             | Reflections collected                            | 48015                                          |
| a (Å)                                     | 12.3552(16)                                                     | Independent reflections                          | 6766                                           |
| b (Å)                                     | 12.6875(16)                                                     | R <sub>int</sub>                                 | 0.0347                                         |
| c (Å)                                     | 14.5673(18)                                                     | Completeness to θ (%)                            | 99.7 (θ = 24.997)                              |
| α (°)                                     | 102.375(4)                                                      | Goodness-of-fit on F <sup>2</sup>                | 1.023                                          |
| β (°)                                     | 115.070(4)                                                      | Final R indices<br>[I > 2σ(I)]                   | R1 = 0.0538                                    |
| γ (°)                                     | 100.058(5)                                                      |                                                  | wR2 = 0.1468                                   |
| Volume (Å <sup>3</sup> )                  | 1927.3(4)                                                       | R indices (all data)                             | R1 = 0.0692                                    |
| Z                                         | 2                                                               |                                                  | wR2 = 0.1619                                   |
| D calcd (mg•m <sup>-3</sup> )             | 1.241                                                           | Largest diff. peak and hole (e Å <sup>-3</sup> ) | 0.86 and -0.50                                 |
| μ (mm <sup>-1</sup> )                     | 0.243                                                           |                                                  |                                                |

**Table S4.** Fractional Atomic Coordinates (×10<sup>4</sup>) and Equivalent Isotropic Displacement Parameters (Å<sup>2</sup>×10<sup>3</sup>) for **BTE-P1**. U<sub>eq</sub> is defined as 1/3 of the trace of the orthogonalised U<sub>ij</sub> tensor.

| Atom | x          | y           | z           | U(eq)     |
|------|------------|-------------|-------------|-----------|
| Cl1  | 3200.6(12) | -3315.5(12) | 10121.8(10) | 122.6(4)  |
| S1   | 3273.0(9)  | -1155.0(9)  | 9631.7(7)   | 87.3(3)   |
| S2   | 5909.0(6)  | 335.4(5)    | 7426.6(5)   | 51.99(19) |
| N3   | 7264.7(18) | 5512.7(15)  | 6044.9(15)  | 44.5(4)   |
| N2   | 6060.8(18) | 4440.8(16)  | 4322.3(15)  | 47.3(5)   |
| N1   | 6609(2)    | 3505.7(18)  | 6611.2(16)  | 58.0(6)   |
| C5   | 8913(2)    | 6723(2)     | 9420(2)     | 58.3(6)   |

---

|     |         |             |            |          |
|-----|---------|-------------|------------|----------|
| C6  | 7666(3) | 6614(3)     | 8763(2)    | 62.3(7)  |
| C7  | 9585(2) | 6384(2)     | 8911(2)    | 62.5(7)  |
| C8  | 7119(2) | 6205(2)     | 7662(2)    | 53.8(6)  |
| C9  | 9049(2) | 5961(2)     | 7815(2)    | 56.0(6)  |
| C10 | 7814(2) | 5880.0(19)  | 7194.9(18) | 44.2(5)  |
| C11 | 9486(3) | 9177(3)     | 6991(3)    | 84.4(10) |
| C12 | 8840(3) | 8079(2)     | 6778(2)    | 67.7(7)  |
| C13 | 9441(3) | 9557(3)     | 6164(3)    | 84.1(10) |
| C14 | 8127(2) | 7332(2)     | 5729(2)    | 50.2(6)  |
| C15 | 8742(3) | 8858(3)     | 5136(3)    | 71.6(8)  |
| C16 | 8044(2) | 7727(2)     | 4862(2)    | 54.7(6)  |
| C17 | 7429(2) | 6168.1(19)  | 5433.5(19) | 45.3(5)  |
| C18 | 6684(2) | 5481(2)     | 4387.5(19) | 45.5(5)  |
| C19 | 7258(2) | 7005(2)     | 3754(2)    | 56.1(6)  |
| C20 | 7092(3) | 7394(3)     | 2881(3)    | 76.7(9)  |
| C21 | 6581(2) | 5871(2)     | 3503(2)    | 51.0(6)  |
| C22 | 6331(4) | 6706(4)     | 1851(3)    | 90.9(11) |
| C23 | 5701(3) | 5590(3)     | 1622(3)    | 84.6(10) |
| C24 | 5830(3) | 5173(3)     | 2447(2)    | 65.6(7)  |
| C25 | 6422(2) | 4483.2(19)  | 5327.0(18) | 43.8(5)  |
| C26 | 5965(2) | 3521.0(19)  | 5610.1(18) | 43.9(5)  |
| C27 | 6203(3) | 2596(2)     | 6831(2)    | 58.6(7)  |
| C28 | 4915(2) | 2641.0(19)  | 4829.4(18) | 46.2(5)  |
| C29 | 5191(2) | 1657.6(19)  | 6101.2(18) | 45.8(5)  |
| C30 | 4534(2) | 1709(2)     | 5075.6(19) | 47.5(5)  |
| C31 | 4835(2) | 665(2)      | 6385.8(19) | 46.8(5)  |
| C32 | 3703(2) | -141.1(19)  | 5908.7(19) | 47.8(5)  |
| C33 | 3668(2) | -1009.9(19) | 6378.9(19) | 46.1(5)  |
| C34 | 4819(2) | -874.6(19)  | 7210.9(19) | 47.0(5)  |
| C35 | 5239(3) | -1631(2)    | 7862(2)    | 58.2(6)  |
| C36 | 2518(2) | -1947.9(19) | 5957(2)    | 48.5(6)  |
| C37 | 1651(3) | -2434(2)    | 4764(2)    | 63.7(7)  |
| C38 | 754(3)  | -3511(3)    | 4629(3)    | 85.3(10) |
| C39 | 913(3)  | -3462(2)    | 5715(3)    | 69.1(8)  |
| C40 | 2069(2) | -2469(2)    | 6488(2)    | 51.6(6)  |
| C41 | 2508(2) | -2186(2)    | 7641(2)    | 56.0(6)  |
| C42 | 2891(3) | -16(2)      | 8150(3)    | 77.3(9)  |
| C43 | 2852(3) | -1125(2)    | 8348(2)    | 64.1(7)  |
| C44 | 2579(3) | -3026(3)    | 8166(3)    | 69.8(8)  |
| C45 | 2976(3) | -2583(3)    | 9224(3)    | 82.6(10) |
| C1  | 9548(3) | 7199(3)     | 10636(2)   | 87.1(11) |
| C2  | 8755(4) | 7662(5)     | 11052(3)   | 140(2)   |

|    |          |         |          |        |
|----|----------|---------|----------|--------|
| C3 | 10675(5) | 8257(5) | 11024(4) | 161(2) |
| C4 | 10173(7) | 6452(6) | 11145(4) | 187(3) |

**Table S5.** Anisotropic Displacement Parameters ( $\text{\AA}^2 \times 10^3$ ) for **BTE-P1**. The Anisotropic displacement factor exponent takes the form:  $-2\pi^2[h^2a^{*2}U_{11}+2hka^*b^*U_{12}+\dots]$ .

| Atom | U11      | U22       | U33      | U23      | U13      | U12      |
|------|----------|-----------|----------|----------|----------|----------|
| C11  | 128.5(9) | 175.6(12) | 125.5(9) | 106.4(9) | 76.6(8)  | 75.3(9)  |
| S1   | 94.3(7)  | 106.8(7)  | 71.3(5)  | 28.5(5)  | 48.4(5)  | 32.2(5)  |
| S2   | 47.0(4)  | 50.3(4)   | 52.0(4)  | 22.5(3)  | 17.9(3)  | 7.3(3)   |
| N3   | 46.2(11) | 43.8(10)  | 42.7(10) | 18.4(8)  | 19.2(9)  | 11.4(9)  |
| N2   | 51.7(12) | 48.2(11)  | 43.3(11) | 19.4(9)  | 22.1(9)  | 14.3(9)  |
| N1   | 60.7(13) | 52.0(12)  | 45.1(11) | 22.1(10) | 13.5(10) | 2.6(10)  |
| C5   | 53.6(15) | 59.9(15)  | 47.9(14) | 7.9(12)  | 17.1(12) | 16.9(12) |
| C6   | 54.2(16) | 82.7(19)  | 51.0(15) | 15.1(14) | 26.2(13) | 28.0(14) |
| C7   | 43.5(14) | 74.2(18)  | 53.8(15) | 11.6(13) | 12.9(12) | 19.9(13) |
| C8   | 43.4(13) | 66.0(16)  | 50.8(14) | 19.7(12) | 19.7(11) | 20.4(12) |
| C9   | 45.4(14) | 68.5(16)  | 52.4(15) | 14.7(12) | 22.3(12) | 22.1(12) |
| C10  | 44.9(13) | 40.8(12)  | 44.2(12) | 16.8(10) | 18.0(10) | 11.6(10) |
| C11  | 88(2)    | 53.8(17)  | 89(2)    | 13.7(16) | 35.3(19) | 0.6(16)  |
| C12  | 74.0(19) | 51.9(15)  | 70.1(18) | 19.7(14) | 32.2(16) | 8.5(14)  |
| C13  | 79(2)    | 54.4(17)  | 114(3)   | 33.8(19) | 45(2)    | 5.2(16)  |
| C14  | 44.6(13) | 48.0(13)  | 64.8(16) | 24.6(12) | 28.1(12) | 16.5(11) |
| C15  | 66.1(18) | 65.0(18)  | 104(3)   | 47.7(18) | 48.8(19) | 20.4(15) |
| C16  | 47.6(14) | 56.9(15)  | 76.9(18) | 36.3(14) | 35.9(14) | 21.2(12) |
| C17  | 44.5(13) | 46.2(12)  | 52.9(14) | 23.6(11) | 25.4(11) | 16.6(10) |
| C18  | 47.8(13) | 47.9(13)  | 49.3(13) | 23.2(11) | 25.8(11) | 18.0(11) |
| C19  | 55.2(15) | 67.6(16)  | 71.1(17) | 41.2(14) | 40.1(14) | 28.0(13) |
| C20  | 81(2)    | 88(2)     | 89(2)    | 57(2)    | 50.7(19) | 26.9(18) |
| C21  | 51.2(14) | 65.0(16)  | 55.1(15) | 32.4(13) | 32.1(12) | 26.6(12) |
| C22  | 100(3)   | 123(3)    | 78(2)    | 66(2)    | 51(2)    | 33(2)    |
| C23  | 97(2)    | 109(3)    | 58.1(18) | 41.6(19) | 40.8(18) | 26(2)    |
| C24  | 73.3(19) | 78.9(19)  | 55.1(16) | 31.5(15) | 35.1(15) | 23.2(15) |
| C25  | 44.5(12) | 44.7(12)  | 42.2(12) | 17.6(10) | 18.9(10) | 13.3(10) |
| C26  | 48.2(13) | 45.7(12)  | 42.0(12) | 19.2(10) | 22.3(11) | 15.5(10) |
| C27  | 62.1(16) | 56.2(15)  | 44.1(13) | 24.6(12) | 14.5(12) | 5.2(12)  |
| C28  | 48.2(13) | 49.1(13)  | 41.0(12) | 17.5(10) | 19.6(11) | 14.5(11) |
| C29  | 46.6(13) | 45.6(12)  | 47.1(13) | 17.2(10) | 23.5(11) | 12.2(10) |

|     |          |          |          |          |          |          |
|-----|----------|----------|----------|----------|----------|----------|
| C30 | 48.1(13) | 44.6(12) | 45.0(13) | 14.3(10) | 19.9(11) | 9.1(10)  |
| C31 | 49.9(14) | 45.8(13) | 47.3(13) | 18.4(11) | 24.2(11) | 14.3(11) |
| C32 | 45.3(13) | 49.2(13) | 49.2(13) | 20.2(11) | 20.5(11) | 14.8(11) |
| C33 | 46.4(13) | 44.4(12) | 52.5(13) | 17.3(11) | 27.0(11) | 14.5(10) |
| C34 | 49.5(14) | 42.7(12) | 51.2(13) | 17.4(10) | 25.7(11) | 12.3(10) |
| C35 | 56.0(15) | 56.0(15) | 66.1(16) | 30.7(13) | 26.7(13) | 18.2(12) |
| C36 | 44.2(13) | 42.2(12) | 58.0(14) | 14.2(11) | 24.1(11) | 13.6(10) |
| C37 | 54.1(16) | 61.9(16) | 62.6(17) | 14.6(13) | 22.4(13) | 9.8(13)  |
| C38 | 70(2)    | 71(2)    | 81(2)    | 2.9(17)  | 27.5(18) | -7.4(16) |
| C39 | 59.0(17) | 53.8(16) | 87(2)    | 15.4(15) | 36.8(16) | 4.6(13)  |
| C40 | 50.2(14) | 40.4(12) | 69.8(16) | 17.9(12) | 33.5(13) | 13.5(11) |
| C41 | 51.8(15) | 53.4(15) | 73.5(17) | 25.2(13) | 37.3(13) | 15.5(12) |
| C42 | 94(2)    | 57.1(17) | 93(2)    | 16.1(16) | 58(2)    | 25.0(16) |
| C43 | 67.7(18) | 65.2(17) | 69.7(18) | 20.5(14) | 42.0(15) | 21.8(14) |
| C44 | 66.4(18) | 69.8(18) | 95(2)    | 40.3(17) | 49.7(18) | 23.3(15) |
| C45 | 73(2)    | 117(3)   | 89(2)    | 60(2)    | 50.2(19) | 39(2)    |
| C1  | 79(2)    | 109(3)   | 48.8(17) | 4.6(17)  | 15.5(16) | 35(2)    |
| C2  | 104(3)   | 209(5)   | 68(2)    | -14(3)   | 41(2)    | 31(3)    |
| C3  | 107(4)   | 179(5)   | 118(4)   | -36(3)   | 47(3)    | -16(3)   |
| C4  | 262(7)   | 219(6)   | 72(3)    | 54(3)    | 47(3)    | 134(5)   |

**Table S6.** Bond Lengths for **BTE-P1**.

| Atom | Atom | Length/Å | Atom | Atom | Length/Å |
|------|------|----------|------|------|----------|
| C11  | C45  | 1.720(3) | C19  | C21  | 1.414(4) |
| S1   | C43  | 1.727(3) | C20  | C22  | 1.361(5) |
| S1   | C45  | 1.700(4) | C21  | C24  | 1.389(4) |
| S2   | C31  | 1.731(2) | C22  | C23  | 1.383(5) |
| S2   | C34  | 1.727(2) | C23  | C24  | 1.375(4) |
| N3   | C10  | 1.441(3) | C25  | C26  | 1.467(3) |
| N3   | C17  | 1.392(3) | C26  | C28  | 1.387(3) |
| N3   | C25  | 1.378(3) | C27  | C29  | 1.386(3) |
| N2   | C18  | 1.369(3) | C28  | C30  | 1.371(3) |
| N2   | C25  | 1.322(3) | C29  | C30  | 1.389(3) |
| N1   | C26  | 1.339(3) | C29  | C31  | 1.462(3) |
| N1   | C27  | 1.333(3) | C31  | C32  | 1.363(3) |
| C5   | C6   | 1.389(4) | C32  | C33  | 1.421(3) |
| C5   | C7   | 1.391(4) | C33  | C34  | 1.373(3) |
| C5   | C1   | 1.522(4) | C33  | C36  | 1.472(3) |
| C6   | C8   | 1.379(4) | C34  | C35  | 1.496(3) |
| C7   | C9   | 1.374(4) | C36  | C37  | 1.511(4) |

|     |     |          |     |     |          |
|-----|-----|----------|-----|-----|----------|
| C8  | C10 | 1.367(3) | C36 | C40 | 1.340(3) |
| C9  | C10 | 1.376(3) | C37 | C38 | 1.519(4) |
| C11 | C12 | 1.374(4) | C38 | C39 | 1.495(5) |
| C11 | C13 | 1.375(5) | C39 | C40 | 1.515(4) |
| C12 | C14 | 1.399(4) | C40 | C41 | 1.466(4) |
| C13 | C15 | 1.357(5) | C41 | C43 | 1.374(4) |
| C14 | C16 | 1.426(3) | C41 | C44 | 1.432(4) |
| C14 | C17 | 1.441(3) | C42 | C43 | 1.492(4) |
| C15 | C16 | 1.413(4) | C44 | C45 | 1.351(5) |
| C16 | C19 | 1.454(4) | C1  | C2  | 1.492(5) |
| C17 | C18 | 1.375(3) | C1  | C3  | 1.554(6) |
| C18 | C21 | 1.441(3) | C1  | C4  | 1.454(6) |
| C19 | C20 | 1.409(4) |     |     |          |

**Table S7.** Bond Angles for **BTE-P1**.

| Atom | Atom | Atom | Angle/°    | Atom | Atom | Atom | Angle/°    |
|------|------|------|------------|------|------|------|------------|
| C45  | S1   | C43  | 91.41(15)  | N2   | C25  | C26  | 122.3(2)   |
| C34  | S2   | C31  | 92.84(11)  | N1   | C26  | C25  | 118.5(2)   |
| C17  | N3   | C10  | 126.02(19) | N1   | C26  | C28  | 122.2(2)   |
| C25  | N3   | C10  | 127.70(18) | C28  | C26  | C25  | 119.3(2)   |
| C25  | N3   | C17  | 106.17(18) | N1   | C27  | C29  | 125.3(2)   |
| C25  | N2   | C18  | 104.95(19) | C30  | C28  | C26  | 119.3(2)   |
| C27  | N1   | C26  | 117.1(2)   | C27  | C29  | C30  | 116.1(2)   |
| C6   | C5   | C7   | 116.6(2)   | C27  | C29  | C31  | 122.3(2)   |
| C6   | C5   | C1   | 123.1(3)   | C30  | C29  | C31  | 121.6(2)   |
| C7   | C5   | C1   | 120.3(3)   | C28  | C30  | C29  | 120.0(2)   |
| C8   | C6   | C5   | 122.0(2)   | C29  | C31  | S2   | 121.62(18) |
| C9   | C7   | C5   | 122.0(2)   | C32  | C31  | S2   | 109.51(17) |
| C10  | C8   | C6   | 119.4(2)   | C32  | C31  | C29  | 128.8(2)   |
| C7   | C9   | C10  | 119.4(2)   | C31  | C32  | C33  | 114.9(2)   |
| C8   | C10  | N3   | 119.4(2)   | C32  | C33  | C36  | 121.7(2)   |
| C8   | C10  | C9   | 120.5(2)   | C34  | C33  | C32  | 111.8(2)   |
| C9   | C10  | N3   | 120.0(2)   | C34  | C33  | C36  | 126.4(2)   |
| C12  | C11  | C13  | 119.9(3)   | C33  | C34  | S2   | 110.92(17) |
| C11  | C12  | C14  | 121.3(3)   | C33  | C34  | C35  | 130.1(2)   |
| C15  | C13  | C11  | 120.2(3)   | C35  | C34  | S2   | 118.90(18) |
| C12  | C14  | C16  | 119.2(2)   | C33  | C36  | C37  | 119.6(2)   |
| C12  | C14  | C17  | 125.0(2)   | C40  | C36  | C33  | 129.4(2)   |
| C16  | C14  | C17  | 115.7(2)   | C40  | C36  | C37  | 111.1(2)   |
| C13  | C15  | C16  | 122.7(3)   | C36  | C37  | C38  | 104.0(2)   |
| C14  | C16  | C19  | 121.5(2)   | C39  | C38  | C37  | 107.2(2)   |

|     |     |     |            |     |     |     |          |
|-----|-----|-----|------------|-----|-----|-----|----------|
| C15 | C16 | C14 | 116.6(3)   | C38 | C39 | C40 | 105.0(2) |
| C15 | C16 | C19 | 121.9(2)   | C36 | C40 | C39 | 110.8(2) |
| N3  | C17 | C14 | 131.7(2)   | C36 | C40 | C41 | 129.7(2) |
| C18 | C17 | N3  | 105.1(2)   | C41 | C40 | C39 | 119.5(2) |
| C18 | C17 | C14 | 123.0(2)   | C43 | C41 | C40 | 126.1(2) |
| N2  | C18 | C17 | 111.56(19) | C43 | C41 | C44 | 111.3(3) |
| N2  | C18 | C21 | 126.6(2)   | C44 | C41 | C40 | 122.6(3) |
| C17 | C18 | C21 | 121.8(2)   | C41 | C43 | S1  | 111.8(2) |
| C20 | C19 | C16 | 122.8(3)   | C41 | C43 | C42 | 129.5(3) |
| C20 | C19 | C21 | 116.5(3)   | C42 | C43 | S1  | 118.7(2) |
| C21 | C19 | C16 | 120.7(2)   | C45 | C44 | C41 | 112.7(3) |
| C22 | C20 | C19 | 121.6(3)   | S1  | C45 | C11 | 120.8(2) |
| C19 | C21 | C18 | 117.1(2)   | C44 | C45 | C11 | 126.4(3) |
| C24 | C21 | C18 | 121.6(2)   | C44 | C45 | S1  | 112.8(2) |
| C24 | C21 | C19 | 121.2(2)   | C5  | C1  | C3  | 108.7(3) |
| C20 | C22 | C23 | 121.0(3)   | C2  | C1  | C5  | 113.8(3) |
| C24 | C23 | C22 | 119.6(3)   | C2  | C1  | C3  | 102.8(4) |
| C23 | C24 | C21 | 120.1(3)   | C4  | C1  | C5  | 112.1(3) |
| N3  | C25 | C26 | 125.5(2)   | C4  | C1  | C2  | 116.4(4) |
| N2  | C25 | N3  | 112.21(19) | C4  | C1  | C3  | 101.5(5) |

**Table S8.** Hydrogen Atom Coordinates ( $\text{\AA}\times 10^4$ ) and Isotropic Displacement Parameters ( $\text{\AA}^2\times 10^3$ ) for **BTE-P1**.

| Atom | x     | y     | z    | U(eq) |
|------|-------|-------|------|-------|
| H6   | 7184  | 6824  | 9076 | 75    |
| H7   | 10424 | 6445  | 9325 | 75    |
| H8   | 6285  | 6151  | 7241 | 65    |
| H9   | 9517  | 5731  | 7495 | 67    |
| H11  | 9954  | 9661  | 7694 | 101   |
| H12  | 8877  | 7829  | 7342 | 81    |
| H13  | 9890  | 10296 | 6309 | 101   |
| H15  | 8723  | 9135  | 4589 | 86    |
| H20  | 7512  | 8138  | 3011 | 92    |
| H22  | 6234  | 6990  | 1292 | 109   |
| H23  | 5193  | 5126  | 915  | 102   |
| H24  | 5413  | 4422  | 2299 | 79    |
| H27  | 6633  | 2591  | 7530 | 70    |
| H28  | 4474  | 2683  | 4146 | 55    |
| H30  | 3835  | 1112  | 4556 | 57    |
| H32  | 3006  | -124  | 5320 | 57    |
| H35A | 6108  | -1551 | 8084 | 87    |
| H35B | 4752  | -2403 | 7438 | 87    |

|      |       |       |       |     |
|------|-------|-------|-------|-----|
| H35C | 5126  | -1426 | 8482  | 87  |
| H37A | 2114  | -2600 | 4382  | 76  |
| H37B | 1205  | -1913 | 4504  | 76  |
| H38A | -102  | -3561 | 4151  | 102 |
| H38B | 944   | -4168 | 4329  | 102 |
| H39A | 1031  | -4158 | 5858  | 83  |
| H39B | 186   | -3345 | 5773  | 83  |
| H42A | 2670  | 452   | 8612  | 116 |
| H42B | 2307  | -140  | 7416  | 116 |
| H42C | 3720  | 352   | 8293  | 116 |
| H44  | 2374  | -3794 | 7815  | 84  |
| H2A  | 8374  | 8126  | 10651 | 210 |
| H2B  | 9266  | 8108  | 11794 | 210 |
| H2C  | 8114  | 7049  | 10979 | 210 |
| H3A  | 11263 | 8043  | 10812 | 241 |
| H3B  | 11076 | 8572  | 11790 | 241 |
| H3C  | 10380 | 8811  | 10710 | 241 |
| H4A  | 9568  | 5854  | 11133 | 280 |
| H4B  | 10790 | 6874  | 11873 | 280 |
| H4C  | 10575 | 6136  | 10764 | 280 |

### 5. DFT theoretical calculations of BTE-P2.

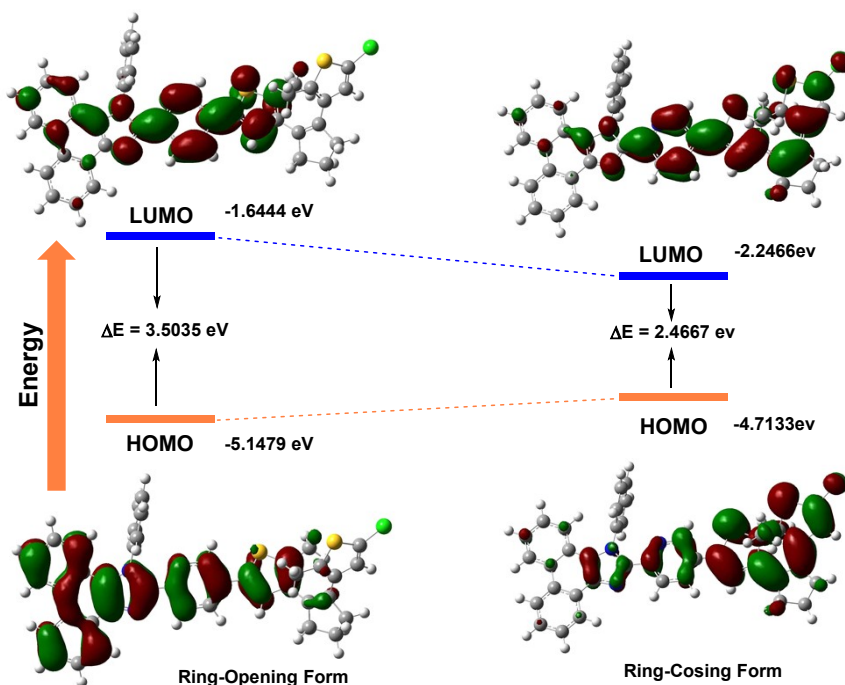

**Fig. S9** Frontier molecular orbitals of **BTE-P2** by Gaussian 09 with the B3LYP/6-31G basis set.

## 6. Hydrodynamic diameters and photophysical properties of BTE-P1@DSPE-PEG2000.

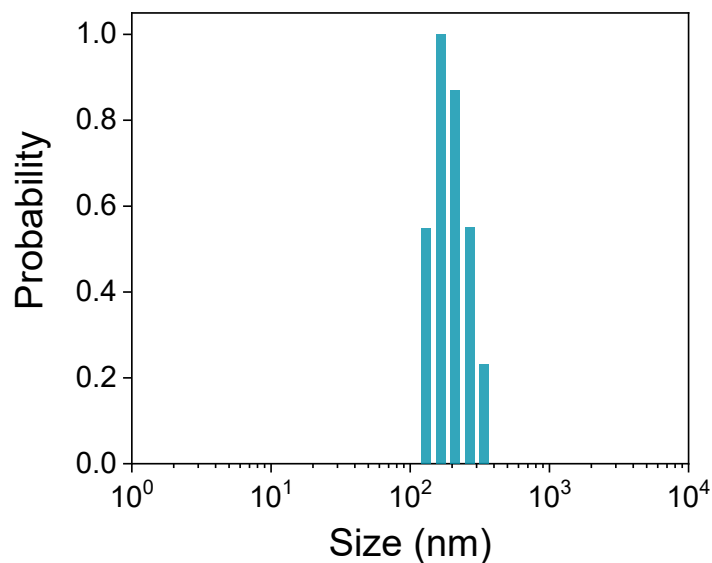

**Fig. S10** Hydrodynamic diameters of **BTE-P1@DSPE-PEG2000** at PBS buffer (pH 7.4)

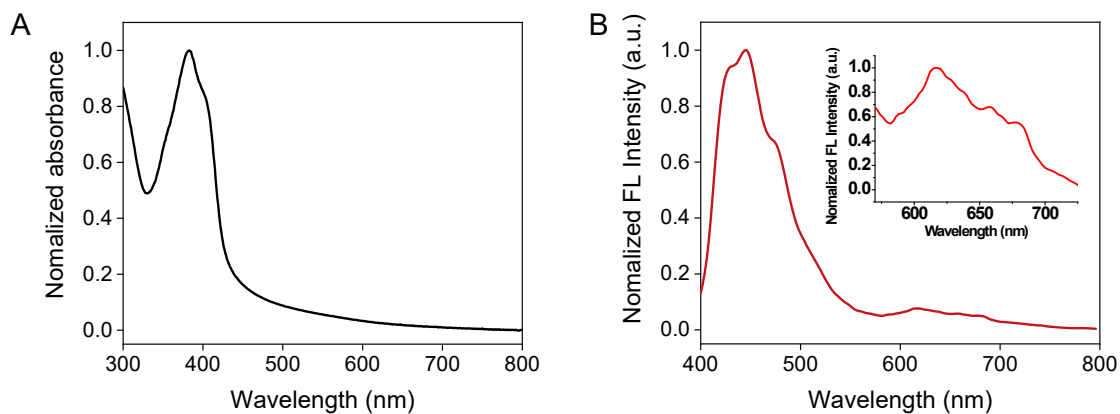

**Fig. S11** Absorption (A) and fluorescence spectra (B,  $\lambda_{\text{ex}} = 350 \text{ nm}$ ) of **BTE-P1@DSPE-PEG2000** in PBS buffer (pH 7.4)



## 7. Appendix: NMR spectra.

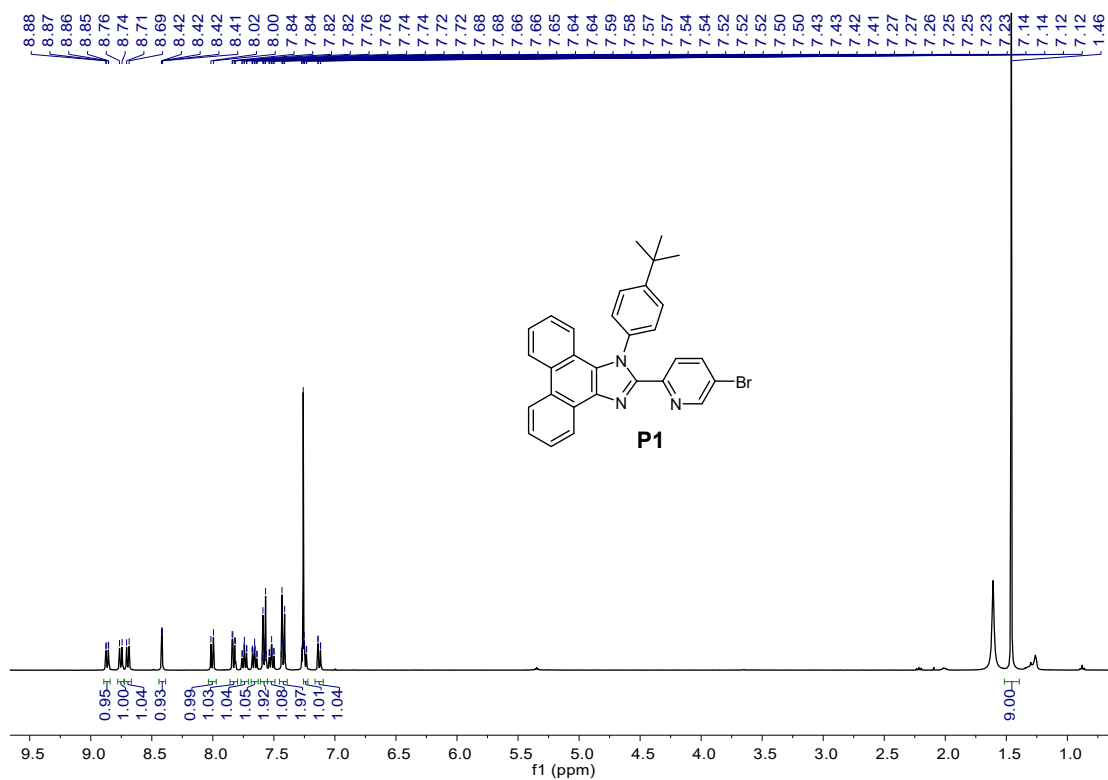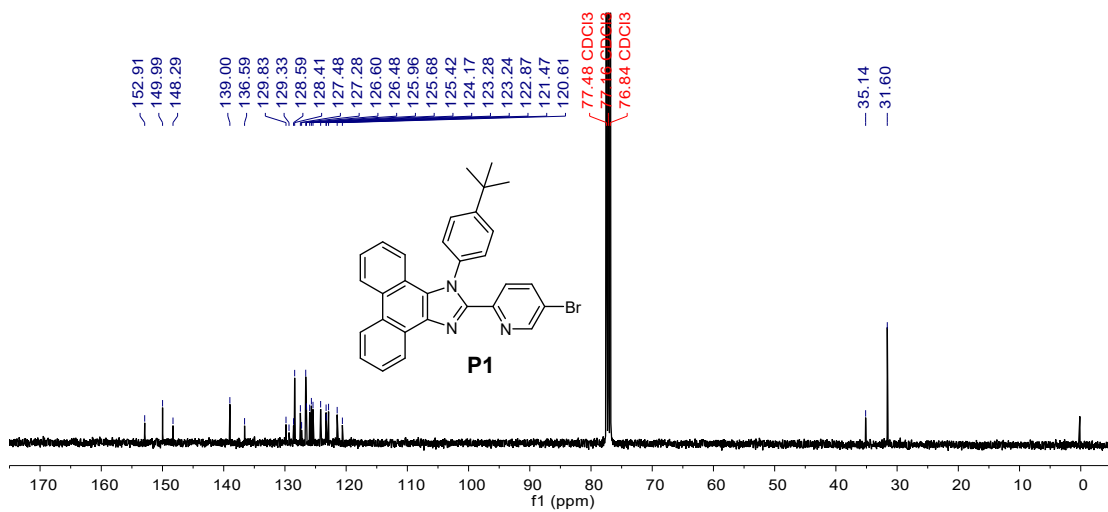

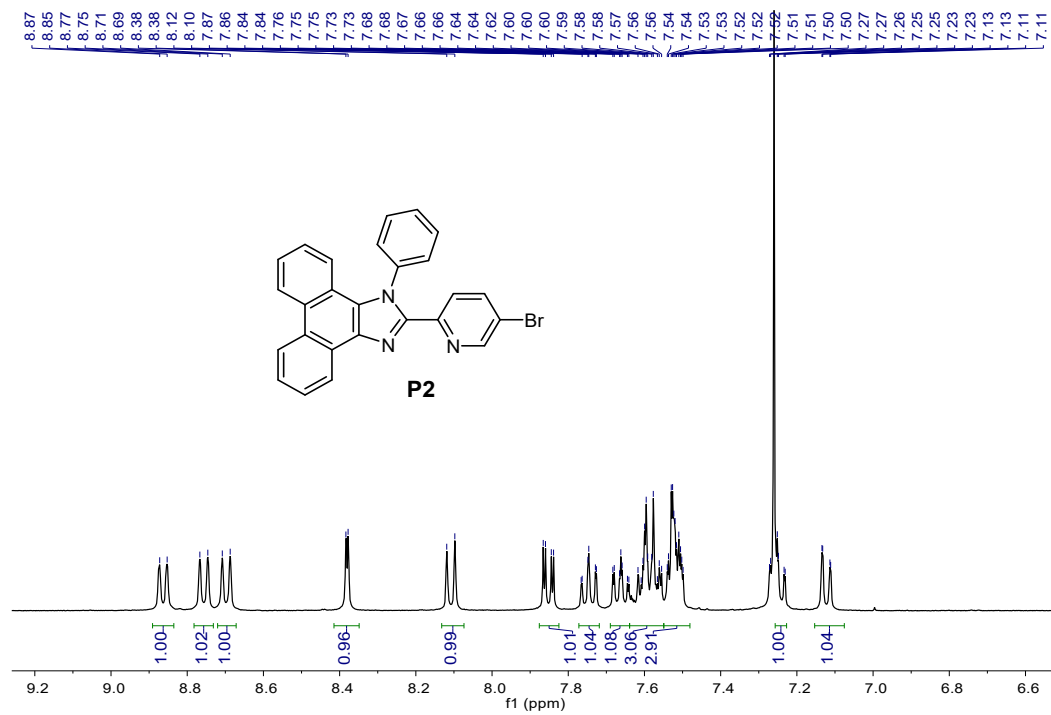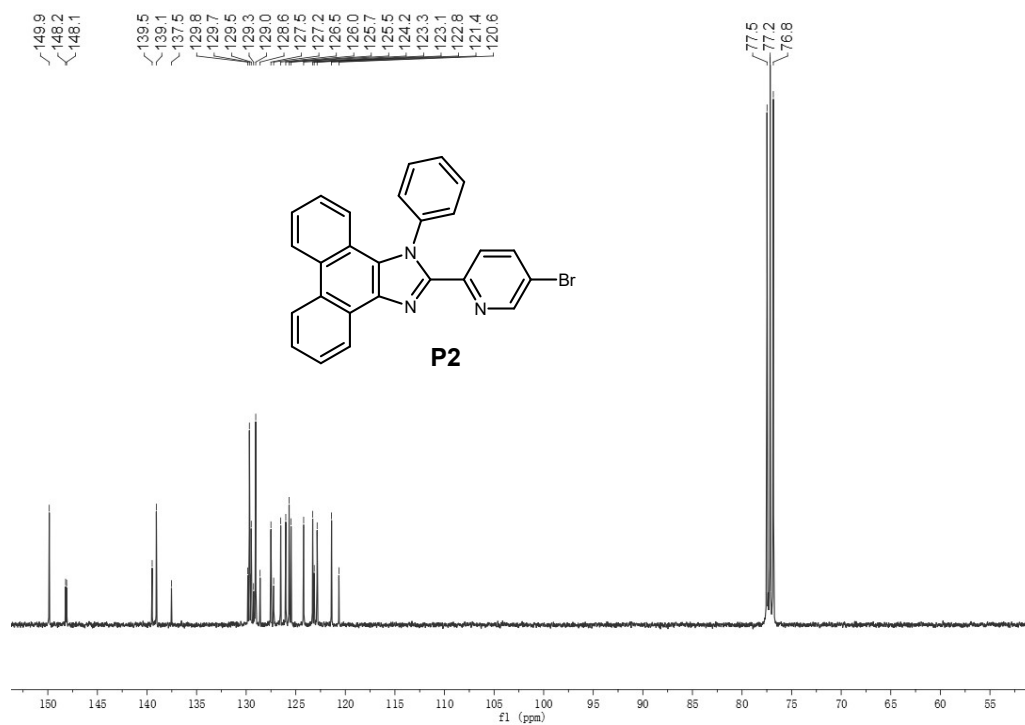

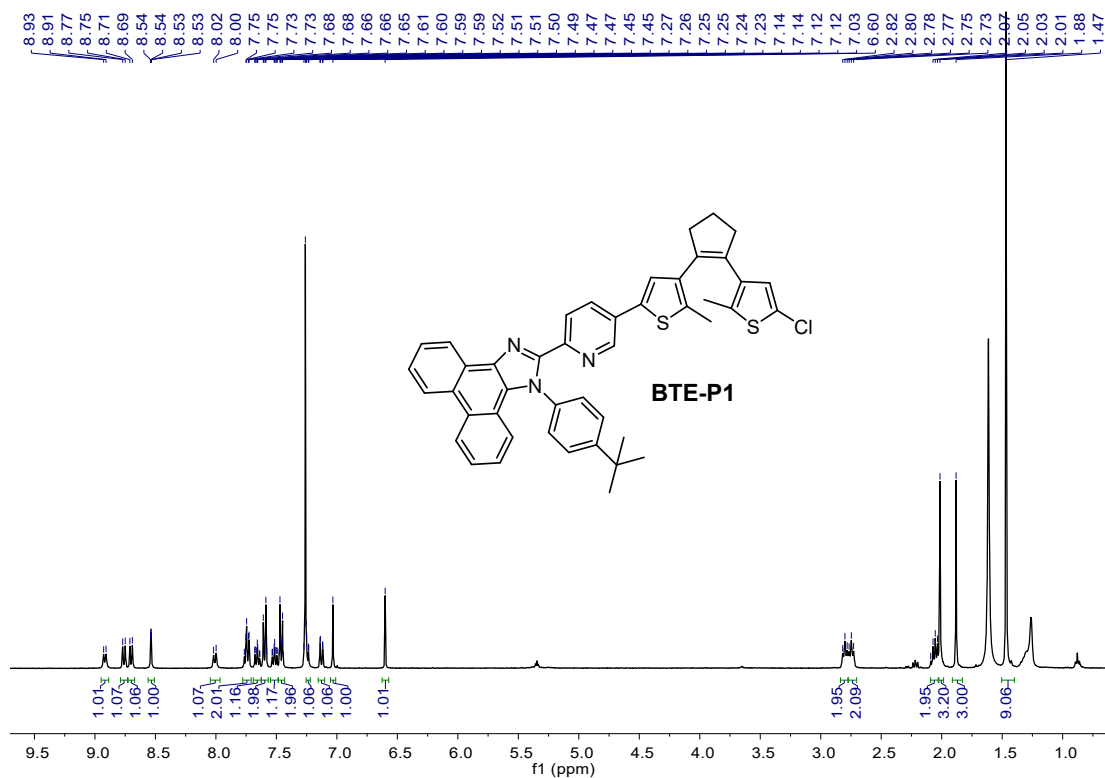

**Fig. S16.**  $^1\text{H}$  MNR of BTE-P1

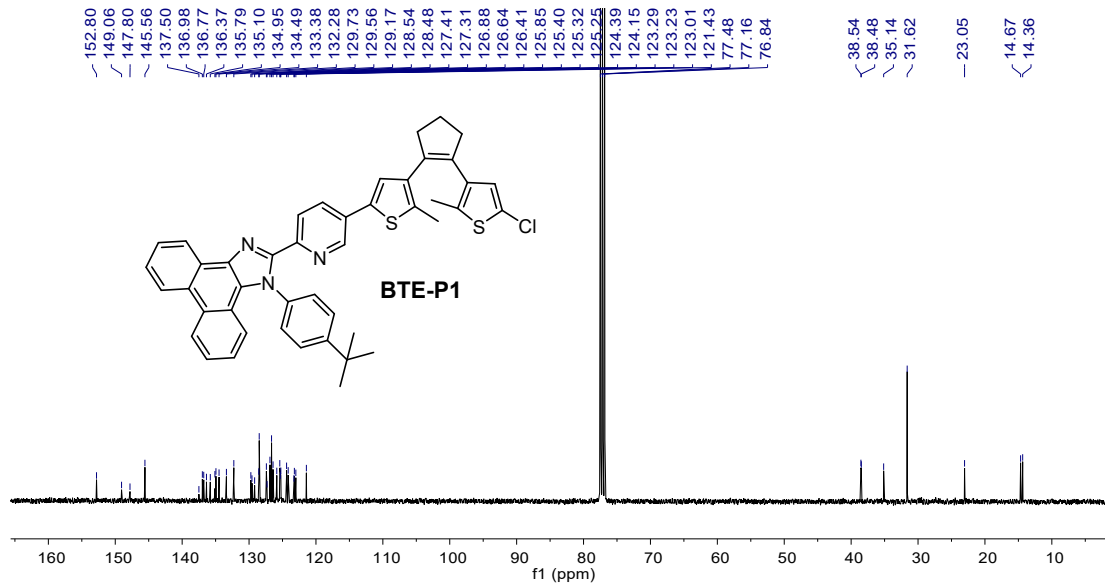

**Fig. S17.**  $^{13}\text{C}$  MNR of BTE-P1

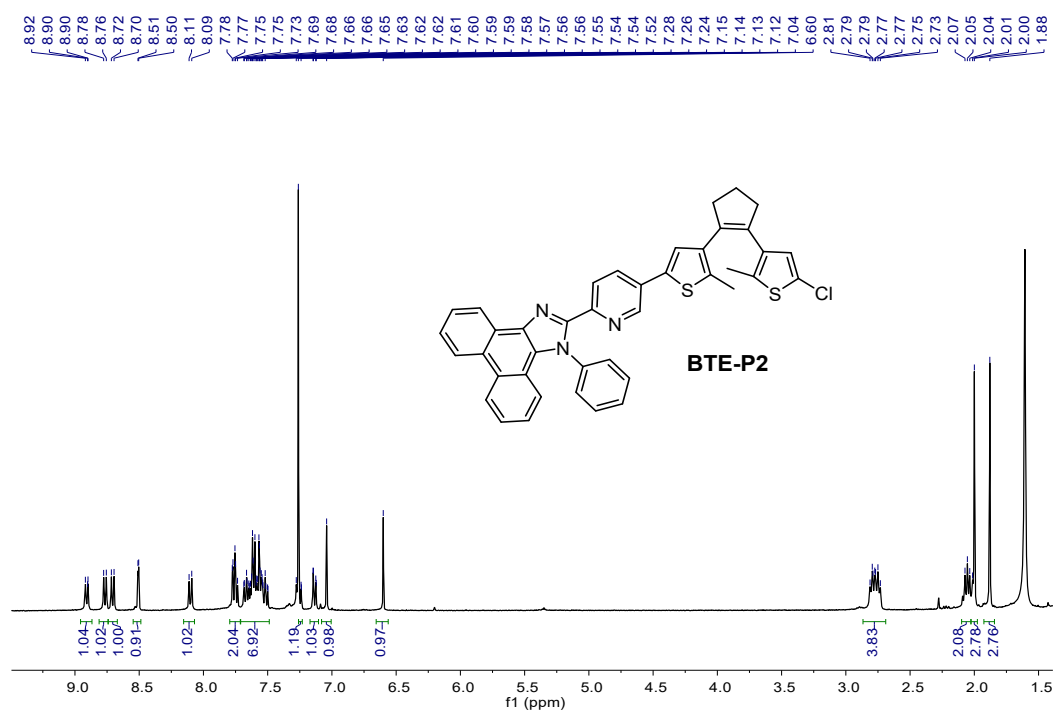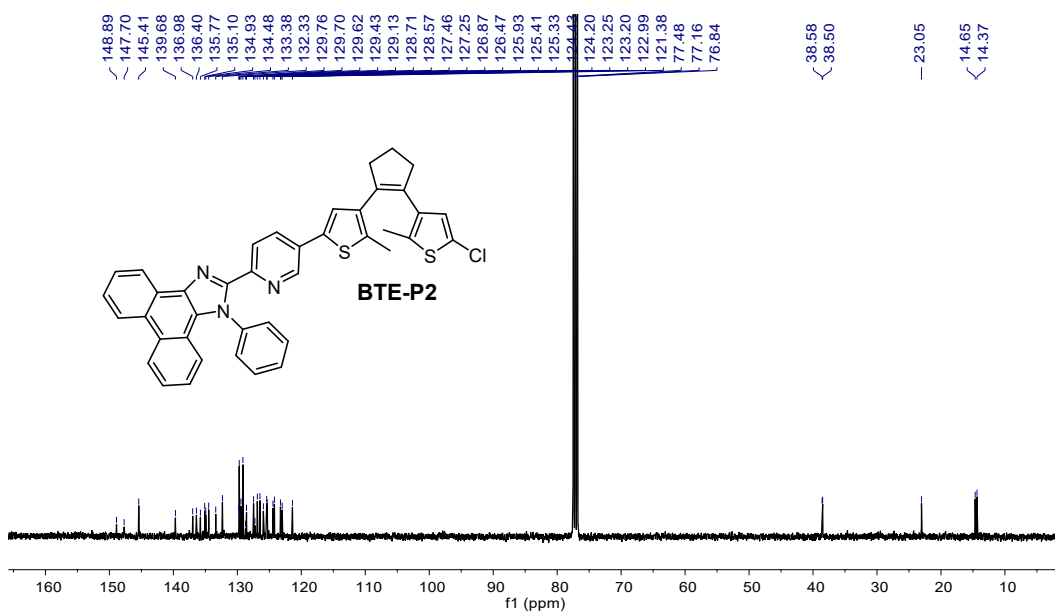

## 8. References

1. L. Ma, C. Li, Q. Yan, S. Wang, W. Miao and D. Cao, *Chin. Chem. Lett.*, 2020, **31**, 361-364.
2. Y. Zhang, J.-H. Wang, J. Zheng and D. Li, *Chem. Commun.*, 2015, **51**, 6350-6353.
